# Supplementary material
Source: PubMed Central journal article supplement (PMC8018016)
Supplement: BPA-30-1017-s006.pdf [file BPA-30-1017-s006.pdf]

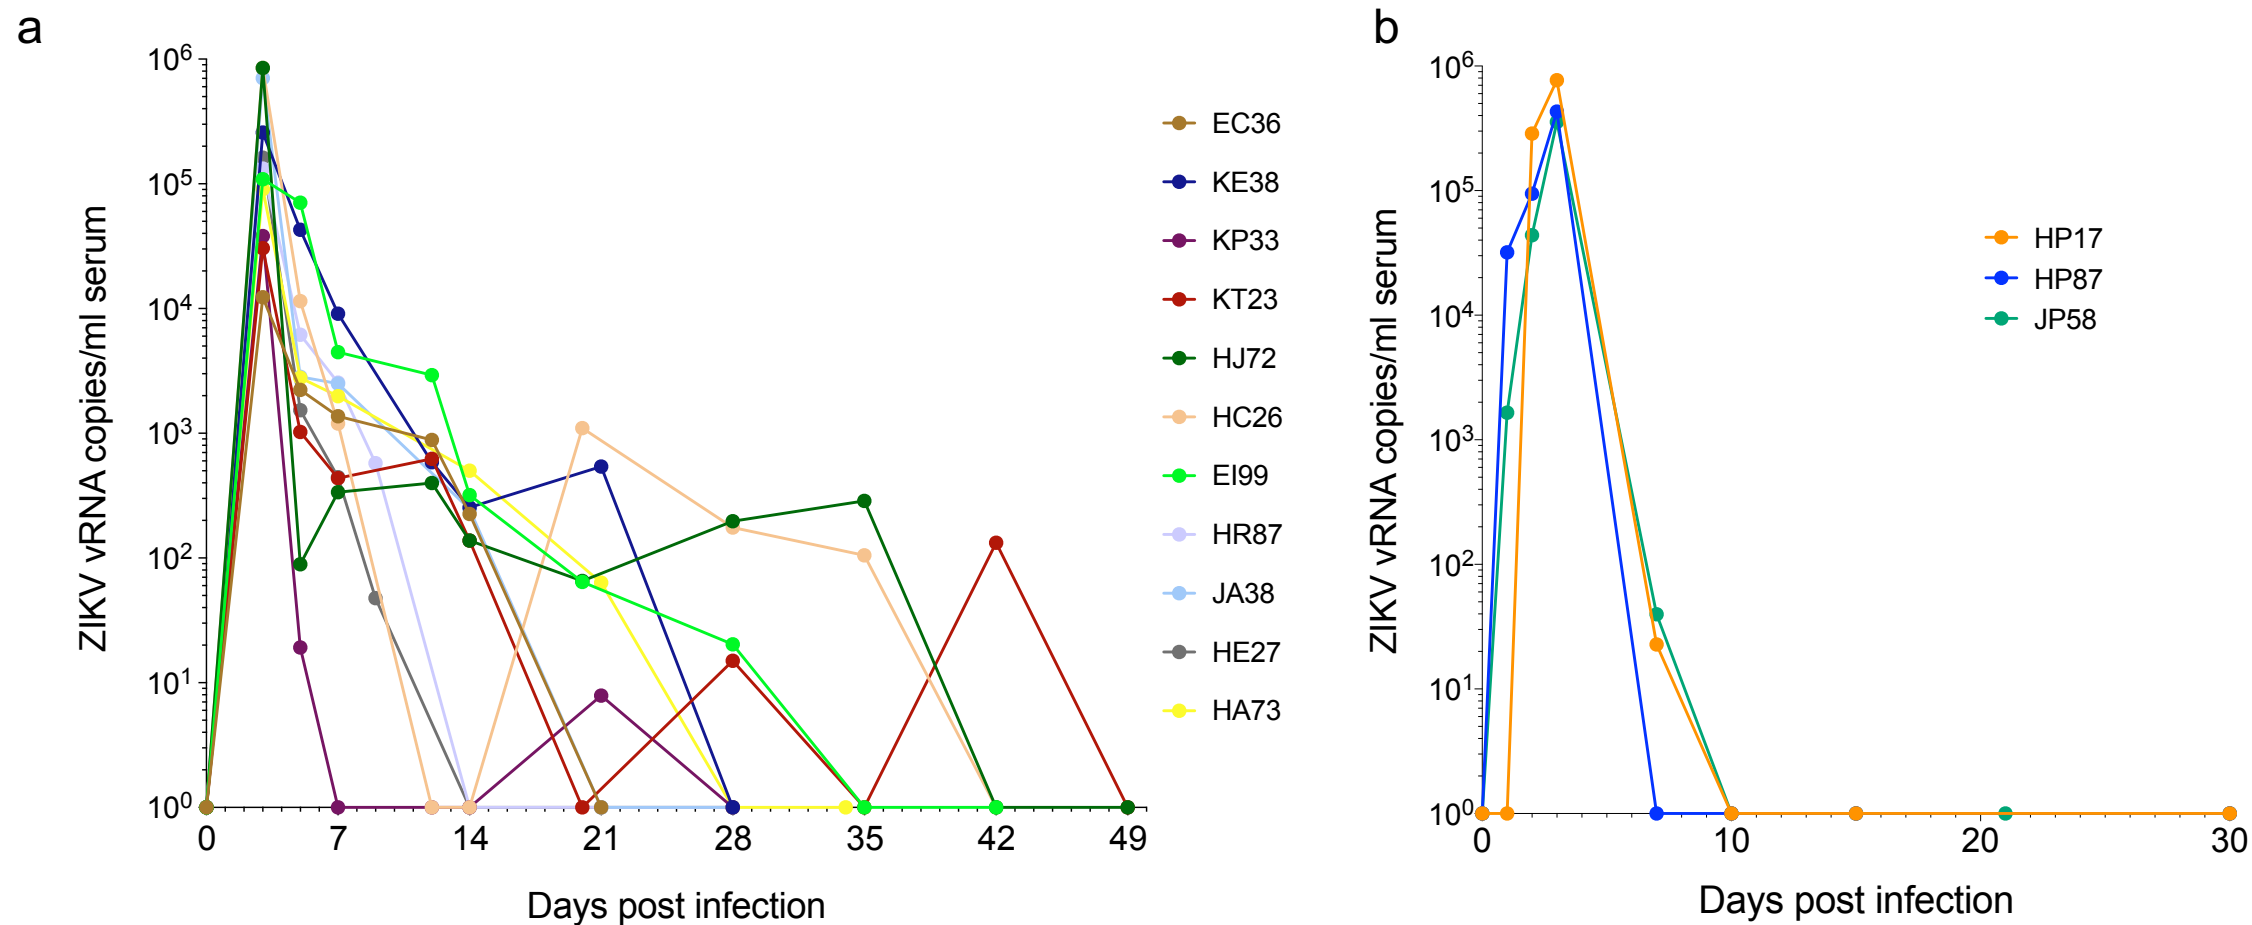

**Supplementary figure 1.** Acute viremia following ZIKV infection. (A) Viremia in eleven of the pregnant females used in the current study. (B) Viremia in the three males used in the study. As reported previously (26), infection of nonpregnant adults results in rapid robust replication of virus as evidenced by quantification of viral RNA in serum with viral clearance from blood after about 7 to 10 days whereas viremia in pregnant females typically persists for longer times.
